# Supplementary material for: Genetic Relationships Between Ethanol-Induced Conditioned Place Aversion and Other Ethanol Phenotypes in 15 Inbred Mouse Strains
Source: PubMed Central journal article supplement (PMC6721285; doi:10.3390/brainsci9080209), 2019-08-20
Supplement: brainsci-09-00209-s001.pdf [file brainsci-09-00209-s001.pdf]

Table S1: Saline (0 g/kg) group strain means ( $\pm$  SEM) for activity (counts/min) during habituation, conditioning and testing and for time spent on the grid floor (s/min) during testing. .

| Strain       | <i>n</i> <sup>#</sup> | Habituation<br>(activity/min) | Saline: Trial 1*<br>(activity/min) | Saline: Trial 4*<br>(activity/min) | Preference Test<br>(s/min) | Test Activity<br>(activity/min) |
|--------------|-----------------------|-------------------------------|------------------------------------|------------------------------------|----------------------------|---------------------------------|
| 129P3/J      | 12                    | 75.0 $\pm$ 4.8                | 54.9 $\pm$ 2.9                     | 38 $\pm$ 3.7                       | 29.6 $\pm$ 3.2             | 32.2 $\pm$ 2.7                  |
| A/HeJ        | 9                     | 57.6 $\pm$ 5.1                | 47.2 $\pm$ 3.5                     | 29.5 $\pm$ 2.6                     | 31.4 $\pm$ 2.9             | 32.0 $\pm$ 2.7                  |
| AKR/J        | 12/13                 | 97.1 $\pm$ 5.1                | 74.1 $\pm$ 4.4                     | 46.9 $\pm$ 5.9                     | 27.8 $\pm$ 1.4             | 50.3 $\pm$ 2.3                  |
| BALB/cJ      | 13                    | 83.6 $\pm$ 4.0                | 70.8 $\pm$ 2.2                     | 65.4 $\pm$ 2.7                     | 33.4 $\pm$ 1.6             | 63.9 $\pm$ 2.7                  |
| C3H/HeJ      | 13                    | 35.8 $\pm$ 1.7                | 33.2 $\pm$ 1.8                     | 25.1 $\pm$ 2.9                     | 31.2 $\pm$ 1.0             | 28.3 $\pm$ 1.2                  |
| C57BL/6J     | 12                    | 112.7 $\pm$ 5.9               | 57.8 $\pm$ 5.1                     | 23.7 $\pm$ 2.3                     | 28.9 $\pm$ 3.5             | 32.7 $\pm$ 2.4                  |
| C57L/J       | 12                    | 117.0 $\pm$ 5.0               | 88.2 $\pm$ 4.8                     | 47.0 $\pm$ 5.4                     | 28.9 $\pm$ 2.4             | 52.1 $\pm$ 4.4                  |
| C58/J        | 12                    | 135.4 $\pm$ 10.7              | 97.8 $\pm$ 6.1                     | 66.2 $\pm$ 9.0                     | 34.0 $\pm$ 2.3             | 97.9 $\pm$ 6.0                  |
| CBA/J        | 13                    | 61.9 $\pm$ 5.0                | 48.7 $\pm$ 1.3                     | 34.3 $\pm$ 3.1                     | 32.8 $\pm$ 1.7             | 30.9 $\pm$ 1.3                  |
| DBA/1J       | 12                    | 80.9 $\pm$ 6.9                | 67.1 $\pm$ 6.1                     | 37.7 $\pm$ 7.0                     | 30.6 $\pm$ 2.7             | 42.1 $\pm$ 3.1                  |
| DBA/2J       | 12                    | 54.5 $\pm$ 5.3                | 50.1 $\pm$ 3.8                     | 35.4 $\pm$ 5.3                     | 26.7 $\pm$ 3.0             | 37.0 $\pm$ 3.4                  |
| NZB/B1NJ     | 12                    | 54.9 $\pm$ 3.5                | 39.7 $\pm$ 3.1                     | 18.7 $\pm$ 3.9                     | 19.7 $\pm$ 2.4             | 22.6 $\pm$ 2.1                  |
| PL/J         | 13                    | 66.0 $\pm$ 3.6                | 64.0 $\pm$ 3.8                     | 50.7 $\pm$ 5.4                     | 33.0 $\pm$ 1.6             | 34.2 $\pm$ 2.4                  |
| SJL/J        | 11/12                 | 51.2 $\pm$ 4.6                | 37.7 $\pm$ 2.7                     | 20.5 $\pm$ 1.4                     | 32.8 $\pm$ 2.8             | 24.7 $\pm$ 1.2                  |
| SWR/J        | 12                    | 76.2 $\pm$ 3.9                | 41.6 $\pm$ 2.4                     | 30.5 $\pm$ 2.0                     | 32.2 $\pm$ 2.0             | 30.8 $\pm$ 1.2                  |
| Grand Mean   |                       | 77.4 $\pm$ 2.4                | 58.4 $\pm$ 1.7                     | 38.3 $\pm$ 1.6                     | 30.2 $\pm$ 0.6             | 40.9 $\pm$ 1.6                  |
| Heritability |                       | 0.70                          | 0.67                               | 0.46                               | 0.17                       | 0.79                            |

\*These scores are the mean activity on the first two saline trials (“Trial 1”) or the last two saline trials (“Trial 4”)

#The second number (if listed) indicates *n* during preference testing; the first number (conditioning trials) is lower due to equipment errors.

Table S2: 2 g/kg group strain means ( $\pm$  SEM) for activity (counts/min) during habituation and conditioning.

| <b>Strain</b> | <b>n*</b> | <b>Habituation</b> | <b>Saline: Trial 1</b> | <b>Saline: Trial 4</b> | <b>Ethanol: Trial 1</b> | <b>Ethanol: Trial 4</b> |
|---------------|-----------|--------------------|------------------------|------------------------|-------------------------|-------------------------|
|               |           | (activity/min)     | (activity/min)         | (activity/min)         | (activity/min)          | (activity/min)          |
| 129P3/J       | 25        | 78.2 $\pm$ 3.7     | 50.1 $\pm$ 3.7         | 23.2 $\pm$ 2.1         | 52.6 $\pm$ 2.9          | 29.9 $\pm$ 2.6          |
| A/HeJ         | -         | -                  | -                      | -                      | -                       | -                       |
| AKR/J         | 24        | 87.8 $\pm$ 3.8     | 70.0 $\pm$ 3.1         | 40.3 $\pm$ 2.9         | 64.2 $\pm$ 3.2          | 42.1 $\pm$ 3.2          |
| BALB/cJ       | 24        | 81.5 $\pm$ 2.9     | 61.8 $\pm$ 2.8         | 46.4 $\pm$ 3.1         | 67.7 $\pm$ 2.3          | 48.7 $\pm$ 2.9          |
| C3H/HeJ       | 25        | 30.2 $\pm$ 1.5     | 32.3 $\pm$ 2.3         | 19.7 $\pm$ 1.8         | 33.8 $\pm$ 2.1          | 17.8 $\pm$ 1.8          |
| C57BL/6J      | 24        | 105.2 $\pm$ 4.3    | 56.5 $\pm$ 5.4         | 17.0 $\pm$ 2.3         | 54.6 $\pm$ 4.8          | 15.8 $\pm$ 1.7          |
| C57L/J        | 25        | 118.7 $\pm$ 3.0    | 89.2 $\pm$ 3.5         | 50.5 $\pm$ 3.4         | 91.8 $\pm$ 5.1          | 51.0 $\pm$ 3.7          |
| C58/J         | 23        | 133.6 $\pm$ 4.7    | 93.9 $\pm$ 4.2         | 46.6 $\pm$ 5.8         | 99.1 $\pm$ 5.2          | 48.0 $\pm$ 6.6          |
| CBA/J         | 25        | 59.6 $\pm$ 2.6     | 49.9 $\pm$ 2.6         | 18.8 $\pm$ 2.1         | 54.8 $\pm$ 3.3          | 19.3 $\pm$ 2.0          |
| DBA/1J        | 26        | 74.6 $\pm$ 4.6     | 66.8 $\pm$ 5.5         | 20.6 $\pm$ 1.8         | 65.5 $\pm$ 3.7          | 19.1 $\pm$ 2.4          |
| DBA/2J        | 24        | 53.3 $\pm$ 2.9     | 46.8 $\pm$ 3.3         | 30.6 $\pm$ 3.4         | 48.2 $\pm$ 1.6          | 29.2 $\pm$ 3.4          |
| NZB/B1NJ      | 24        | 49.5 $\pm$ 2.3     | 36.6 $\pm$ 3.3         | 8.9 $\pm$ 1.8          | 37.0 $\pm$ 2.7          | 9.6 $\pm$ 1.9           |
| PL/J          | 25        | 66.9 $\pm$ 2.5     | 62.2 $\pm$ 3.4         | 43.7 $\pm$ 2.0         | 62.2 $\pm$ 2.0          | 43.7 $\pm$ 1.9          |
| SJL/J         | 24        | 48.8 $\pm$ 2.9     | 30.7 $\pm$ 2.3         | 15.7 $\pm$ 1.6         | 34.5 $\pm$ 2.1          | 15.8 $\pm$ 1.5          |
| SWR/J         | 25        | 78.8 $\pm$ 3.2     | 46.3 $\pm$ 2.9         | 30.4 $\pm$ 1.9         | 48.1 $\pm$ 3.2          | 32.2 $\pm$ 2.2          |
| Grand Mean    |           | 75.9 $\pm$ 1.7     | 56.6 $\pm$ 1.4         | 29.4 $\pm$ 1.0         | 58.1 $\pm$ 1.3          | 30.1 $\pm$ 1.1          |
| Heritability  |           | 0.74               | 0.52                   | 0.50                   | .57                     | 0.48                    |

\*G+ and G- groups combined

Table S3: 4 g/kg group strain means ( $\pm$  SEM) for activity (counts/min) during habituation and conditioning.

| Strain       | <i>n</i> * | Habituation<br>(activity/min) | Saline: Trial 1<br>(activity/min) | Saline: Trial 4<br>(activity/min) | Ethanol: Trial 1<br>(activity/min) | Ethanol: Trial 4<br>(activity/min) |
|--------------|------------|-------------------------------|-----------------------------------|-----------------------------------|------------------------------------|------------------------------------|
| 129P3/J      | 25         | 73.8 $\pm$ 4.2                | 47.1 $\pm$ 4                      | 22.7 $\pm$ 1.9                    | 48.2 $\pm$ 3.5                     | 25.1 $\pm$ 2.0                     |
| A/HeJ        | 18         | 61.6 $\pm$ 3.8                | 45.4 $\pm$ 2.9                    | 12.3 $\pm$ 2.5                    | 44.8 $\pm$ 3.7                     | 8.8 $\pm$ 2.3                      |
| AKR/J        | 23         | 94.1 $\pm$ 4.6                | 63.8 $\pm$ 4.0                    | 31.4 $\pm$ 3.1                    | 72.9 $\pm$ 5.2                     | 32.2 $\pm$ 2.5                     |
| BALB/cJ      | 24         | 82.7 $\pm$ 3.1                | 64.4 $\pm$ 3.2                    | 36.2 $\pm$ 3.2                    | 70.6 $\pm$ 2.6                     | 37.1 $\pm$ 3.2                     |
| C3H/HeJ      | 25         | 32.9 $\pm$ 1.6                | 29 $\pm$ 1.9                      | 18.9 $\pm$ 1.8                    | 32.4 $\pm$ 1.5                     | 17.5 $\pm$ 2.2                     |
| C57BL/6J     | 24         | 106.2 $\pm$ 5.6               | 54.7 $\pm$ 4.0                    | 13.6 $\pm$ 1.7                    | 57.5 $\pm$ 5.7                     | 17.0 $\pm$ 1.8                     |
| C57L/J       | 24         | 114.8 $\pm$ 3.7               | 93.9 $\pm$ 5.7                    | 39.7 $\pm$ 3.5                    | 92.7 $\pm$ 4.8                     | 39.8 $\pm$ 3.4                     |
| C58/J        | 24         | 121.4 $\pm$ 5.1               | 98.6 $\pm$ 4.5                    | 47.3 $\pm$ 6.6                    | 103.8 $\pm$ 3.1                    | 45.8 $\pm$ 5.2                     |
| CBA/J        | 25         | 56.5 $\pm$ 2.9                | 45.4 $\pm$ 2.3                    | 16.8 $\pm$ 2.0                    | 50.1 $\pm$ 2.4                     | 21.6 $\pm$ 3.0                     |
| DBA/1J       | 25         | 73.0 $\pm$ 4.6                | 61.6 $\pm$ 5.3                    | 23.1 $\pm$ 1.9                    | 71.3 $\pm$ 4.1                     | 22.4 $\pm$ 2.3                     |
| DBA/2J       | 24         | 55.0 $\pm$ 4.1                | 46.2 $\pm$ 2.8                    | 20.1 $\pm$ 2.7                    | 53.7 $\pm$ 2.6                     | 22.3 $\pm$ 2.4                     |
| NZB/B1NJ     | 24         | 55.3 $\pm$ 2.1                | 38.8 $\pm$ 4.2                    | 8.4 $\pm$ 1.4                     | 43.3 $\pm$ 3.2                     | 8.8 $\pm$ 1.9                      |
| PL/J         | 24         | 69.7 $\pm$ 2.4                | 61.4 $\pm$ 2.5                    | 39.1 $\pm$ 2.1                    | 62.0 $\pm$ 3.1                     | 38.3 $\pm$ 3.2                     |
| SJL/J        | 24         | 50.2 $\pm$ 1.8                | 30.2 $\pm$ 2.6                    | 15.1 $\pm$ 1.3                    | 29.7 $\pm$ 2.3                     | 11.5 $\pm$ 1.4                     |
| SWR/J        | 23         | 80.9 $\pm$ 3.1                | 44.3 $\pm$ 2.2                    | 24.3 $\pm$ 1.7                    | 42.5 $\pm$ 1.9                     | 29.8 $\pm$ 2.7                     |
| Grand Mean   |            | 75.2 $\pm$ 1.6                | 55.1 $\pm$ 1.4                    | 24.8 $\pm$ 0.9                    | 58.5 $\pm$ 1.4                     | 25.4 $\pm$ 0.9                     |
| Heritability |            | 0.66                          | 0.55                              | 0.41                              | 0.60                               | 0.41                               |

\*G+ and G- groups combined

Table 4: 2 g/kg group strain means ( $\pm$  SEM) for time spent on the grid floor (s/min), percent time on the ethanol floor and activity (counts/min) during testing.

| Strain       | (n) | G+ (s/min)     | (n) | G- (s/min)                  | Percent EtOH Time* | Test Activity** (activity/min) |
|--------------|-----|----------------|-----|-----------------------------|--------------------|--------------------------------|
| 129P3/J      | 13  | 28.5 $\pm$ 4.3 | 12  | 44.2 $\pm$ 3.4 <sup>c</sup> | 37.3 $\pm$ 5       | 27.2 $\pm$ 1.8                 |
| A/HeJ        | -   | -              | -   | -                           | -                  | -                              |
| AKR/J        | 13  | 25.6 $\pm$ 3.2 | 13  | 38.2 $\pm$ 3.4 <sup>b</sup> | 39.5 $\pm$ 3.9     | 40.4 $\pm$ 3.0                 |
| BALB/cJ      | 12  | 31.2 $\pm$ 2.9 | 12  | 38.1 $\pm$ 2.3              | 44.2 $\pm$ 3.4     | 46.8 $\pm$ 2.4                 |
| C3H/HeJ      | 13  | 31.3 $\pm$ 1.7 | 12  | 41.5 $\pm$ 2.5 <sup>a</sup> | 41.9 $\pm$ 3.3     | 24.1 $\pm$ 1.2                 |
| C57BL/6J     | 12  | 25.4 $\pm$ 3.3 | 12  | 39.6 $\pm$ 2.5 <sup>b</sup> | 38.2 $\pm$ 3.5     | 30.7 $\pm$ 2.0                 |
| C57L/J       | 12  | 28.9 $\pm$ 2.9 | 13  | 28.0 $\pm$ 1.8              | 50.9 $\pm$ 2.8     | 57.8 $\pm$ 2.9                 |
| C58/J        | 12  | 33.1 $\pm$ 2.7 | 11  | 33.6 $\pm$ 2.8              | 49.9 $\pm$ 3.3     | 85.2 $\pm$ 3.3                 |
| CBA/J        | 13  | 29.7 $\pm$ 3.1 | 12  | 40.8 $\pm$ 3.9 <sup>a</sup> | 41.1 $\pm$ 4.4     | 28.1 $\pm$ 1.4                 |
| DBA/1J       | 14  | 29.4 $\pm$ 3.6 | 12  | 49.2 $\pm$ 2.5 <sup>c</sup> | 34.7 $\pm$ 4.8     | 28.3 $\pm$ 1.9                 |
| DBA/2J       | 12  | 24.5 $\pm$ 4.1 | 12  | 37.2 $\pm$ 5.2 <sup>b</sup> | 39.4 $\pm$ 5.4     | 28.9 $\pm$ 1.3                 |
| NZB/B1NJ     | 12  | 20.6 $\pm$ 3.0 | 12  | 29.8 $\pm$ 4.7              | 42.3 $\pm$ 4.9     | 15.8 $\pm$ 1.3                 |
| PL/J         | 13  | 28.0 $\pm$ 2.3 | 12  | 30.3 $\pm$ 2.2              | 48.1 $\pm$ 2.6     | 32.4 $\pm$ 1.4                 |
| SJL/J        | 12  | 18.4 $\pm$ 2.8 | 14  | 31.4 $\pm$ 4.7 <sup>b</sup> | 39.8 $\pm$ 5.0     | 20.3 $\pm$ 1.4                 |
| SWR/J        | 13  | 22.3 $\pm$ 2.2 | 12  | 43.9 $\pm$ 3.8 <sup>c</sup> | 32.2 $\pm$ 3.6     | 29.6 $\pm$ 2.0                 |
| Grand Mean   |     | 27.0 $\pm$ 0.9 |     | 37.4 $\pm$ 1.0              | 41.3 $\pm$ 1.1     | 35.1                           |
| Heritability |     | 0.13           |     | 0.21                        | 0.06               | 0.74                           |

\*Percent time on ethanol-paired floor for G+ and G- groups combined

\*\*Activity combined for G+ and G- groups

c =  $p < .001$ , b =  $p < .01$ , a =  $p < .05$ , significant difference from G+

Table S5: 4 g/kg group strain means ( $\pm$  SEM) for time spent on the grid floor (s/min), percent time on the ethanol floor and activity (counts/min) during testing.

| Strain       | (n) | G+ (s/min)     | (n) | G- (s/min)                  | Percent EtOH Time* | Test Activity**<br>(activity/min) |
|--------------|-----|----------------|-----|-----------------------------|--------------------|-----------------------------------|
| 129P3/J      | 13  | 14.5 $\pm$ 2.7 | 12  | 48.2 $\pm$ 2.4 <sup>c</sup> | 22.0 $\pm$ 3.0     | 21.9 $\pm$ 1.8                    |
| A/HeJ        | 9   | 23.2 $\pm$ 5.7 | 9   | 42.7 $\pm$ 4.8 <sup>b</sup> | 33.8 $\pm$ 6.2     | 16.4 $\pm$ 1.7                    |
| AKR/J        | 12  | 20.1 $\pm$ 3.8 | 12  | 46.0 $\pm$ 4.5 <sup>c</sup> | 28.4 $\pm$ 4.9     | 27.1 $\pm$ 3.2                    |
| BALB/cJ      | 12  | 17.9 $\pm$ 5.0 | 12  | 47.0 $\pm$ 3.0 <sup>c</sup> | 25.8 $\pm$ 4.8     | 28.5 $\pm$ 3.1                    |
| C3H/HeJ      | 12  | 24.6 $\pm$ 2.0 | 13  | 37.3 $\pm$ 3.0 <sup>a</sup> | 39.4 $\pm$ 3.0     | 24.0 $\pm$ 1.7                    |
| C57BL/6J     | 12  | 22.2 $\pm$ 3.2 | 12  | 34.6 $\pm$ 3.9 <sup>a</sup> | 39.7 $\pm$ 4.1     | 27.6 $\pm$ 2.3                    |
| C57L/J       | 12  | 26.8 $\pm$ 2.8 | 12  | 34.7 $\pm$ 3.3              | 43.5 $\pm$ 3.5     | 52.3 $\pm$ 2.9                    |
| C58/J        | 12  | 26.8 $\pm$ 3.4 | 12  | 34.2 $\pm$ 4.1              | 43.9 $\pm$ 4.3     | 73.3 $\pm$ 5.6                    |
| CBA/J        | 12  | 14.5 $\pm$ 2.8 | 13  | 44.9 $\pm$ 3.2 <sup>c</sup> | 24.7 $\pm$ 3.5     | 23.2 $\pm$ 1.5                    |
| DBA/1J       | 12  | 23.0 $\pm$ 2.7 | 13  | 41.4 $\pm$ 3.9 <sup>c</sup> | 34.5 $\pm$ 4.0     | 26.3 $\pm$ 1.6                    |
| DBA/2J       | 12  | 14.6 $\pm$ 3.7 | 12  | 43.9 $\pm$ 4.6 <sup>c</sup> | 25.5 $\pm$ 4.8     | 20.1 $\pm$ 1.8                    |
| NZB/B1NJ     | 12  | 20.1 $\pm$ 4.2 | 12  | 31.6 $\pm$ 5.6 <sup>a</sup> | 40.4 $\pm$ 5.9     | 12.6 $\pm$ 1.1                    |
| PL/J         | 11  | 27.2 $\pm$ 2.2 | 13  | 30.8 $\pm$ 4.0              | 47.1 $\pm$ 3.9     | 29.9 $\pm$ 1.7                    |
| SJL/J        | 13  | 11.1 $\pm$ 1.7 | 12  | 38.8 $\pm$ 5.1 <sup>c</sup> | 26.5 $\pm$ 4.6     | 13.8 $\pm$ 1.2                    |
| SWR/J        | 11  | 15.0 $\pm$ 2.9 | 12  | 47.2 $\pm$ 3.1 <sup>c</sup> | 23.1 $\pm$ 3.5     | 25.1 $\pm$ 2.4                    |
| Grand Mean   |     | 20.0 $\pm$ 0.9 |     | 40.1 $\pm$ 1.1              | 33.2 $\pm$ 1.2     | 28.3 $\pm$ 1.0                    |
| Heritability |     | 0.18           |     | 0.16                        | 0.14               | 0.61                              |

\*Percent time on ethanol-paired floor for G+ and G- groups combined

\*\*Activity combined for G+ and G- groups

c =  $p < .001$ , b =  $p < .01$ , a =  $p < .05$ , significant difference from G+

Table S6: Summary of analyses to determine whether significant CPA was obtained in each strain (see main text).

| Strain   | G+ vs. G- |        | PDT vs 50% |        |        | G± vs. Saline-Only Group |      |      |      |
|----------|-----------|--------|------------|--------|--------|--------------------------|------|------|------|
|          | 2 g/kg    | 4 g/kg | 0 g/kg     | 2 g/kg | 4 g/kg | 2:G+                     | 2:G- | 4:G+ | 4:G- |
| 129P3/J  | c         | c      | ns         | a      | c      | ns                       | a    | c    | c    |
| A/HeJ    | -         | a      | ns         | -      | a      | -                        | -    | ns   | ns   |
| AKR/J    | a         | c      | ns         | a      | c      | ns                       | a    | ns   | b    |
| BALB/cJ  | ns        | c      | ns         | ns     | c      | ns                       | ns   | b    | a    |
| C3H/HeJ  | c         | c      | ns         | a      | b      | ns                       | c    | ns   | ns   |
| C57BL/6J | b         | ns     | ns         | b      | a      | ns                       | ns   | ns   | ns   |
| C57L/J   | ns        | ns     | ns         | ns     | ns     | ns                       | ns   | ns   | ns   |
| C58/J    | ns        | ns     | ns         | ns     | ns     | ns                       | ns   | ns   | ns   |
| CBA/J    | a         | c      | ns         | ns     | c      | ns                       | ns   | c    | b    |
| DBA/1J   | c         | c      | ns         | b      | c      | ns                       | c    | ns   | ns   |
| DBA/2J   | ns        | c      | ns         | ns     | c      | ns                       | ns   | ns   | b    |
| NZB/B1NJ | ns        | ns     | ns         | ns     | ns     | ns                       | ns   | ns   | ns   |
| PL/J     | ns        | ns     | ns         | ns     | ns     | ns                       | ns   | ns   | ns   |
| SJL/J    | ns        | c      | ns         | ns     | c      | a                        | ns   | c    | ns   |
| SWR/J    | c         | c      | ns         | c      | c      | a                        | a    | c    | c    |

c =  $p < .001$ , b =  $p < .01$ , a =  $p < .05$ , ns = not significant;

Note: In all cases, the difference showed place aversion, not preference.

Table S7: Genetic correlations (Pearson r) between activity phenotypes during habituation and conditioning.

| Phenotype* | HAB-0                    | HAB-2                    | HAB-4                    | C1-0                     | C1-2                     | C1-4                     | C4-0                    | C4-2                    | C4-4  | (C4-HAB)-<br>0           | (C4-HAB)-<br>2           | (C4-HAB)-<br>4 |
|------------|--------------------------|--------------------------|--------------------------|--------------------------|--------------------------|--------------------------|-------------------------|-------------------------|-------|--------------------------|--------------------------|----------------|
| HAB-0      | --                       | --                       | --                       | --                       | --                       | --                       | --                      | --                      | --    | --                       | --                       | --             |
| HAB-2      | <b>0.99<sup>c</sup></b>  | --                       | --                       | --                       | --                       | --                       | --                      | --                      | --    | --                       | --                       | --             |
| HAB-4      | <b>0.99<sup>c</sup></b>  | <b>0.99<sup>c</sup></b>  | --                       | --                       | --                       | --                       | --                      | --                      | --    | --                       | --                       | --             |
| C1-0       | <b>0.87<sup>c</sup></b>  | <b>0.87<sup>c</sup></b>  | <b>0.86<sup>c</sup></b>  | --                       | --                       | --                       | --                      | --                      | --    | --                       | --                       | --             |
| C1-2       | <b>0.88<sup>c</sup></b>  | <b>0.89<sup>c</sup></b>  | <b>0.86<sup>c</sup></b>  | <b>0.98<sup>c</sup></b>  | --                       | --                       | --                      | --                      | --    | --                       | --                       | --             |
| C1-4       | <b>0.88<sup>c</sup></b>  | <b>0.88<sup>c</sup></b>  | <b>0.86<sup>c</sup></b>  | <b>0.99<sup>c</sup></b>  | <b>0.99<sup>c</sup></b>  | --                       | --                      | --                      | --    | --                       | --                       | --             |
| C4-0       | <b>0.59<sup>a</sup></b>  | <b>0.61<sup>a</sup></b>  | <b>0.59<sup>a</sup></b>  | <b>0.84<sup>c</sup></b>  | <b>0.81<sup>c</sup></b>  | <b>0.81<sup>c</sup></b>  | --                      | --                      | --    | --                       | --                       | --             |
| C4-2       | <b>0.58<sup>a</sup></b>  | <b>0.63<sup>a</sup></b>  | <b>0.63<sup>a</sup></b>  | <b>0.79<sup>c</sup></b>  | <b>0.78<sup>c</sup></b>  | <b>0.77<sup>c</sup></b>  | <b>0.89<sup>c</sup></b> | --                      | --    | --                       | --                       | --             |
| C4-4       | <b>0.66<sup>b</sup></b>  | <b>0.69<sup>b</sup></b>  | <b>0.67<sup>b</sup></b>  | <b>0.84<sup>c</sup></b>  | <b>0.85<sup>c</sup></b>  | <b>0.83<sup>c</sup></b>  | <b>0.91<sup>c</sup></b> | <b>0.96<sup>c</sup></b> | --    | --                       | --                       | --             |
| (C4-HAB)-0 | <b>-0.85<sup>c</sup></b> | <b>-0.82<sup>c</sup></b> | <b>-0.83<sup>c</sup></b> | <b>-0.53<sup>a</sup></b> | <b>-0.55<sup>a</sup></b> | <b>-0.56<sup>a</sup></b> | -0.08                   | -0.12                   | -0.21 | --                       | --                       | --             |
| (C4-HAB)-2 | <b>-0.89<sup>c</sup></b> | <b>-0.88<sup>c</sup></b> | <b>-0.86<sup>c</sup></b> | <b>-0.61<sup>a</sup></b> | <b>-0.64<sup>a</sup></b> | <b>-0.63<sup>a</sup></b> | -0.22                   | -0.17                   | -0.27 | <b>-0.95<sup>c</sup></b> | --                       | --             |
| (C4-HAB)-4 | <b>-0.89<sup>c</sup></b> | <b>-0.89<sup>c</sup></b> | <b>-0.90<sup>c</sup></b> | <b>-0.61<sup>a</sup></b> | <b>-0.63<sup>a</sup></b> | <b>-0.63<sup>a</sup></b> | -0.22                   | -0.27                   | -0.27 | <b>-0.95<sup>c</sup></b> | <b>-0.95<sup>c</sup></b> | --             |

c =  $p < 0.001$ , b =  $p < 0.01$ , a =  $p < 0.05$ ; significant correlations are shown in boldface

\*The suffix (-0, -2, -4) indicates the ethanol dose group; HAB = habituation day activity rate; C1 = conditioning trial 1 activity rate; C4 = conditioning trial 4 activity rate; C4-HAB = difference in activity rates between conditioning trial 4 and habituation trial 1

Note: C1 and C4 scores are based on the average of the CS+ and CS- trials (see text for explanation).
